# Supplementary material for: Novel electrochemically-mediated peptide dethiylation in processes relevant to native chemical ligation
Source: Royal Society of Chemistry journal article supplement (doi:10.1039/d2ob01499h), 2022-01-01

## Novel electrochemically-mediated peptide dehylation in processes relevant to native chemical ligation

Charles M.G. Lamb, Jian Shi, Jonathan D. Wilden and Derek Macmillan\*

### Supporting information

Cyclic voltammetry conditions: CV plots were measured on an Ivium Technologies Vertex model potentiostat operating with a glassy carbon working electrode, silver wire reference electrode and Pt wire counter electrode. The analyte was dissolved to a concentration of 1 mg/mL in deoxygenated 2:1 water/MeCN (10 mL) with 0.1 M LiClO<sub>4</sub> as the supporting electrolyte. Voltammograms were recorded at a scan rate of 100 mV/s.

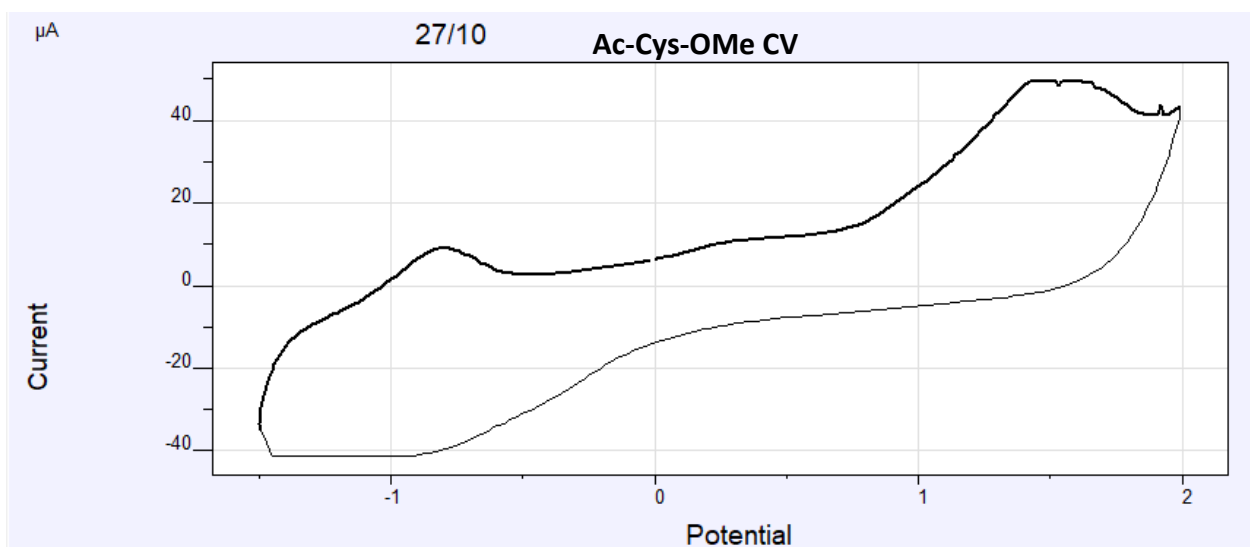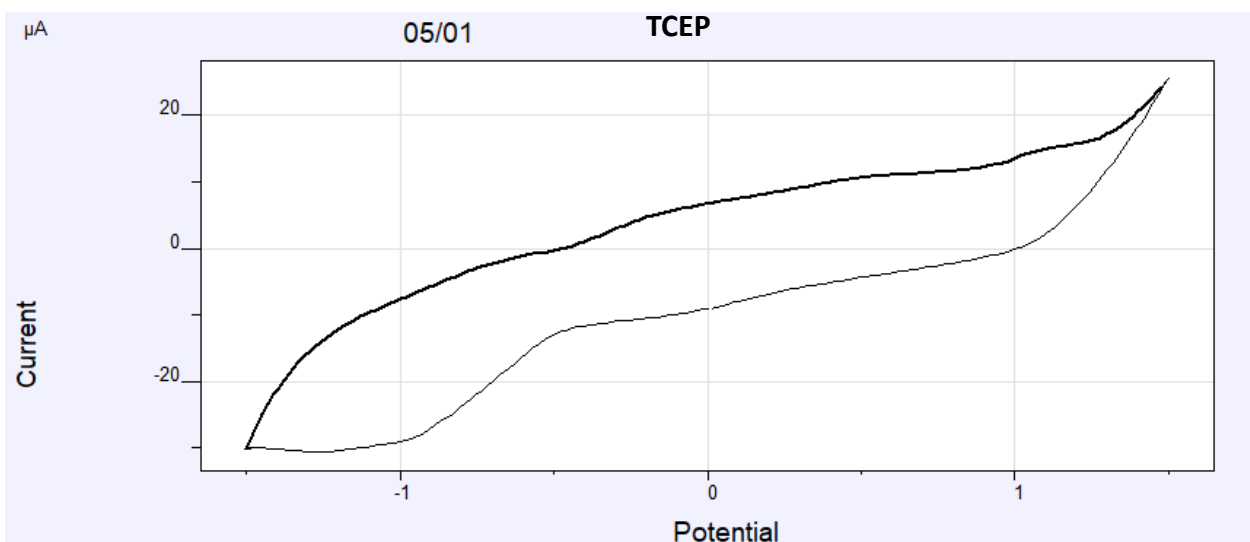

Example NMR after extraction, shows a 7:2 mixture of Alanine to Cysteine

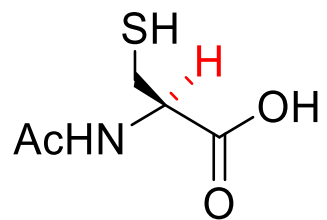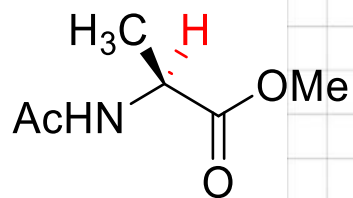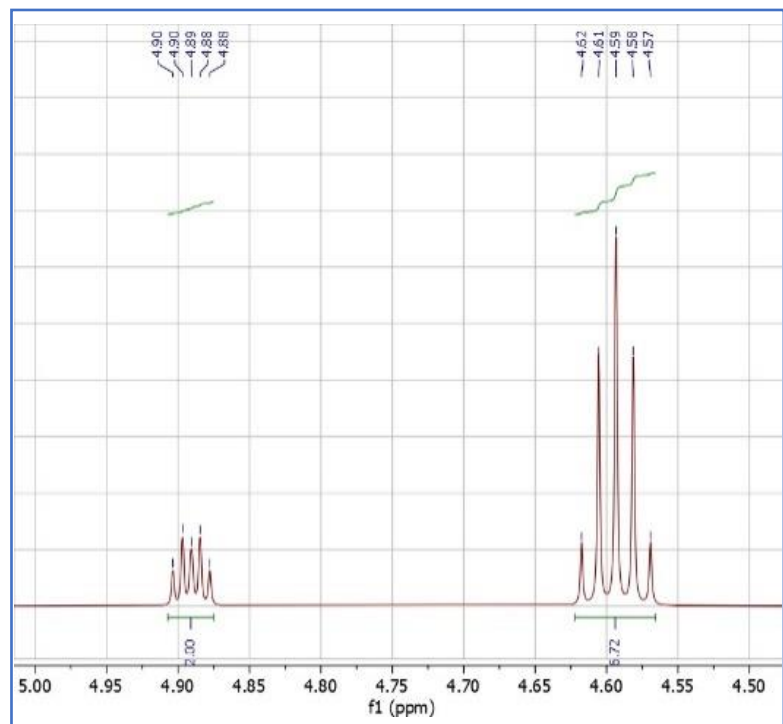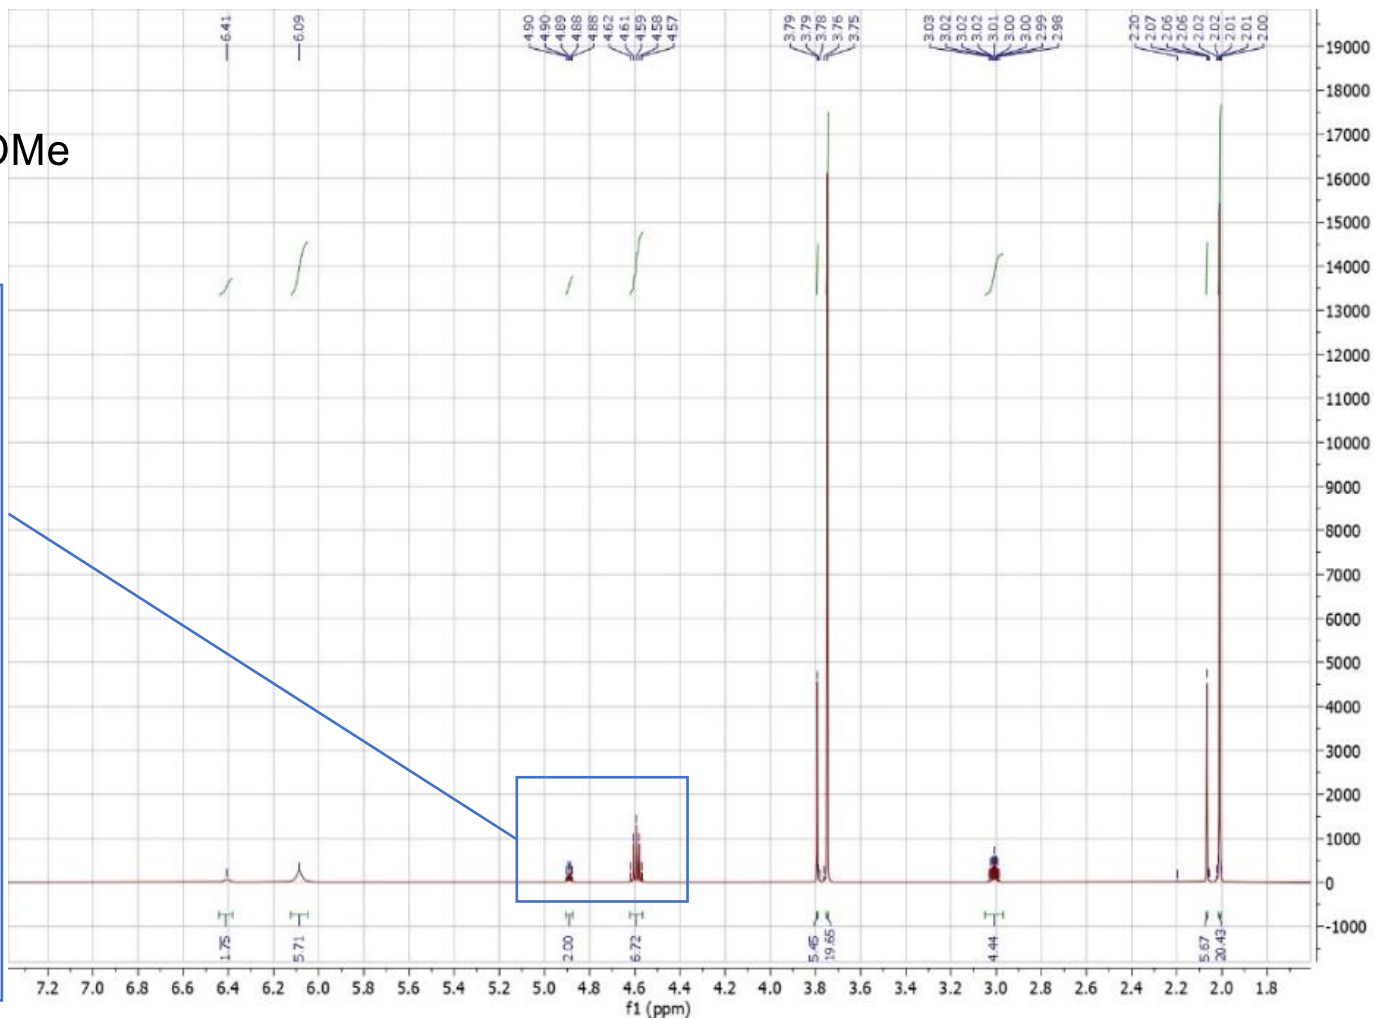

Linear peptide 3:

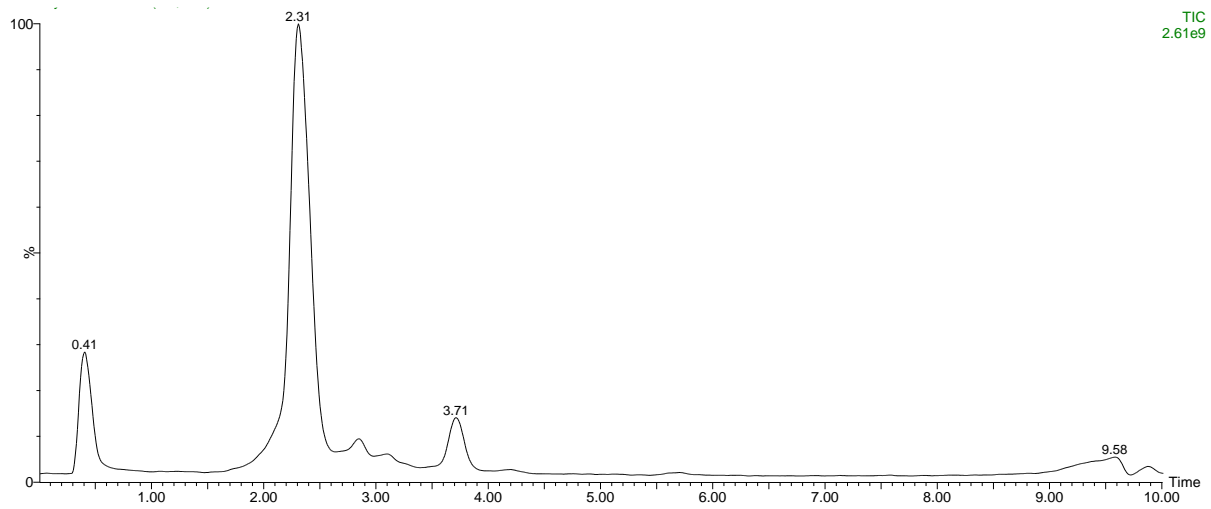

IAPA-Cys Fr56-58 252 (2.327) Cm (241:265)

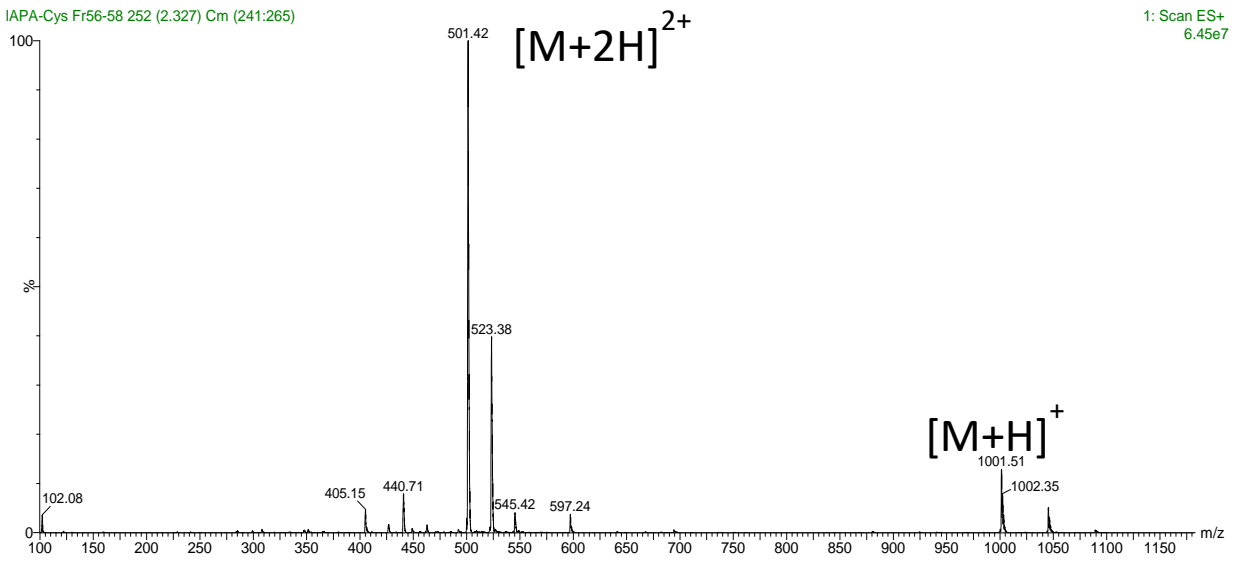

Linear Peptide 4.

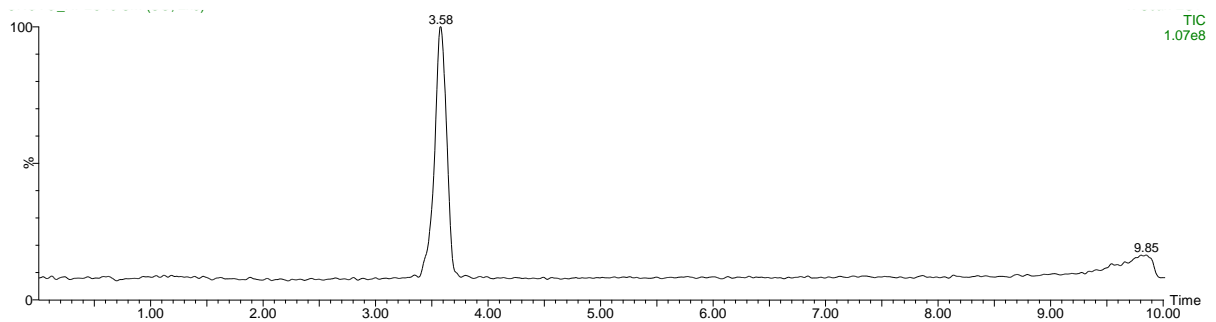

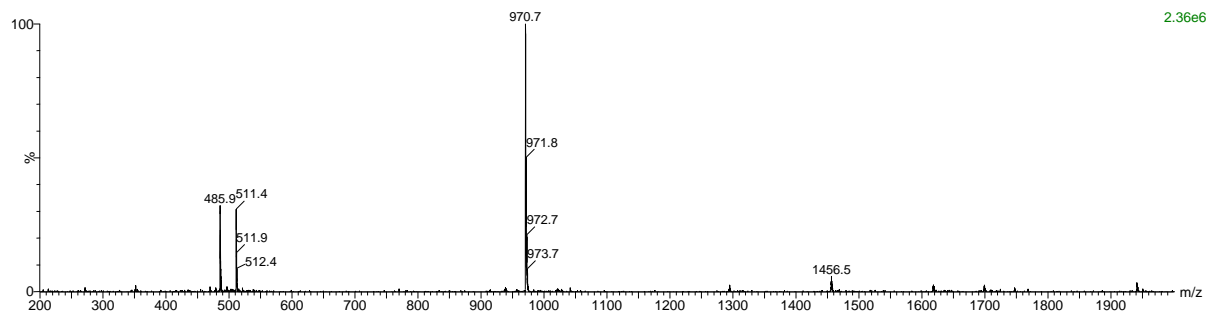

*cyclic peptide 5*

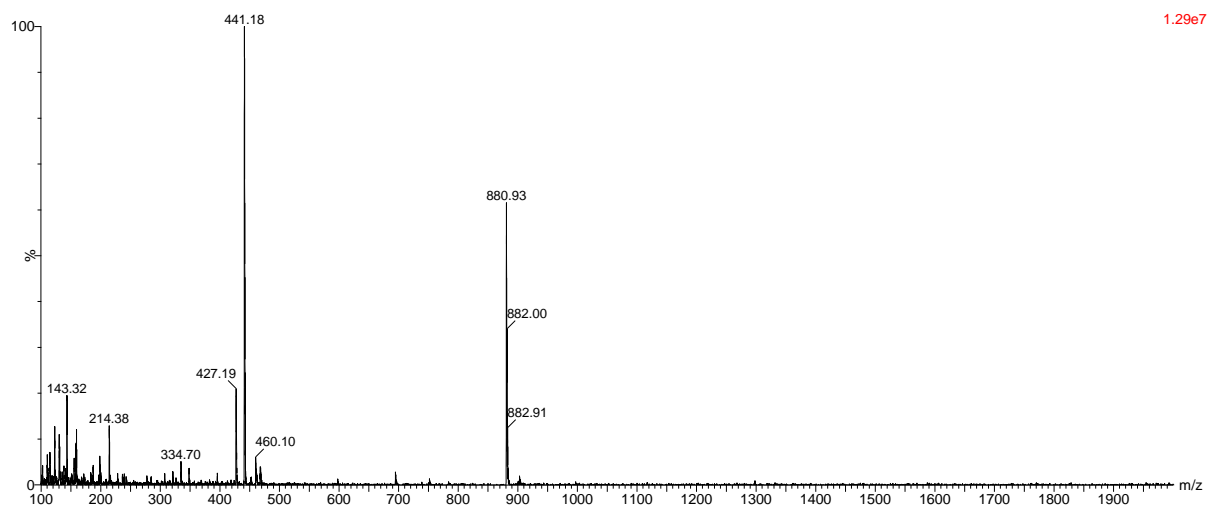

*Cyclic peptide 6*

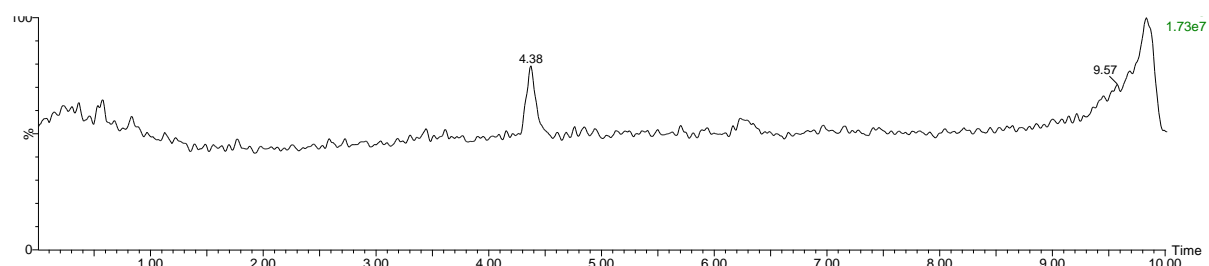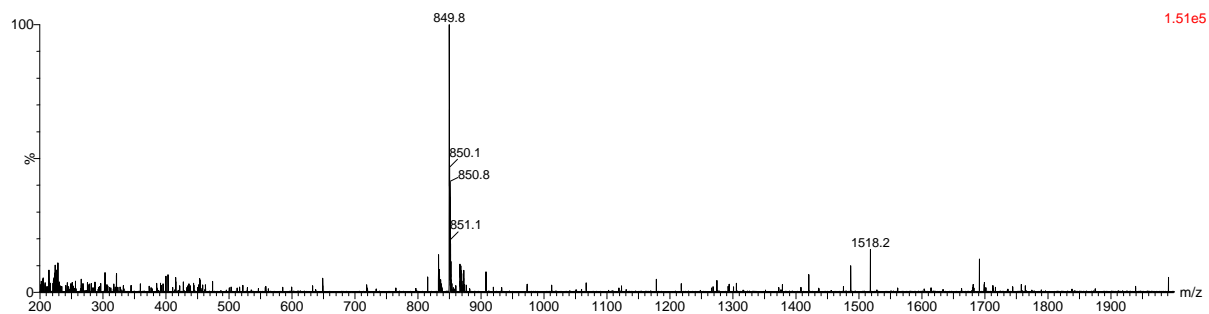

## Electrochemical desulfurization of **6**.

2h

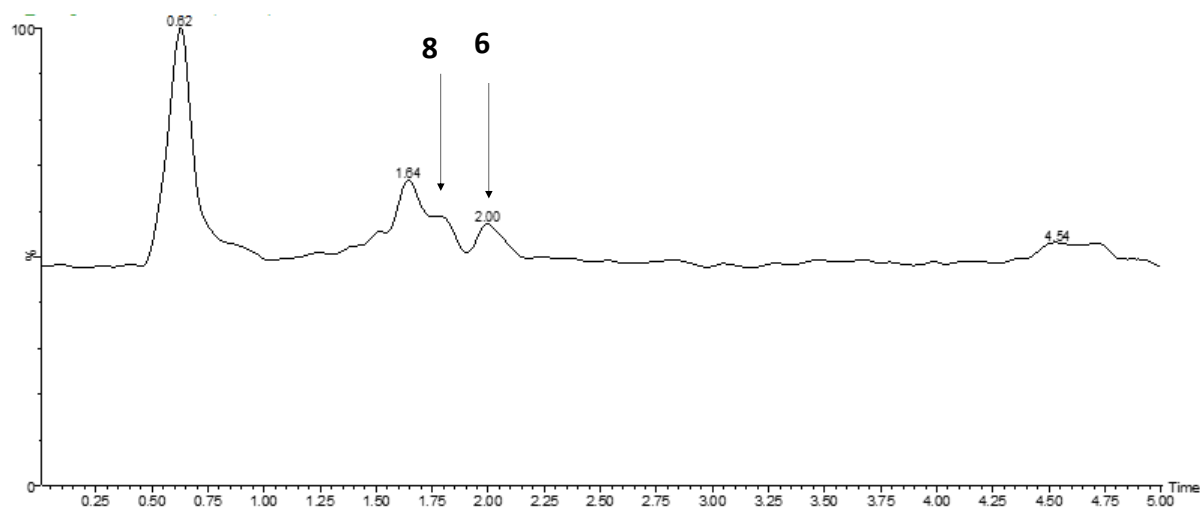

6h

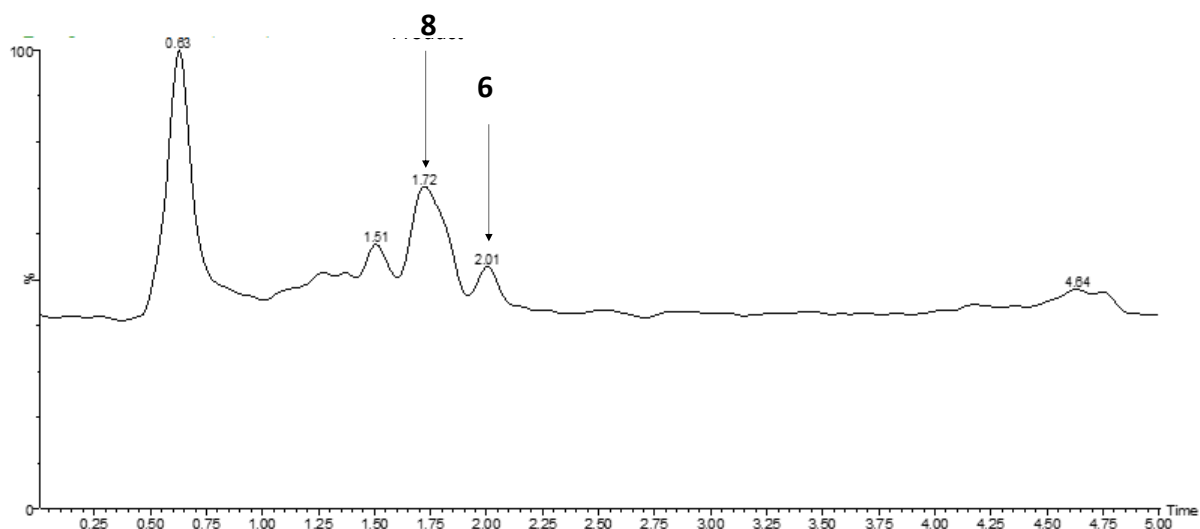

**Methionine containing Agardhipeptin analogue:** The linear peptide (H-Cys-Trp-Pro-Trp-Gly-Met-His-Cys-OH) was synthesised via our general solid phase peptide synthesis procedure, and isolated by semi-preparative HPLC and lyophilization to afford a white fluffy solid (9.6 mg, 19%),  $t_R = 31.8$  min. **ESI-MS:** calculated  $m/z$  for  $C_{46}H_{58}N_{12}O_9S_3$   $[M]^+$  1018.36, observed  $[M+H]^+$  1019.66.

**Cyclisation via N→S acyl transfer:** was conducted as above for cyclic peptide **5**. The product, obtained from (9.6 mg, 9.42  $\mu$ mol) linear starting material, was purified via semi-preparative HPLC and lyophilization to produce a fluffy white powder of peptide **11** (5.6 mg, 6.24  $\mu$ mol, 48%).  $t_R = 30.6$  min. **ESI-MS:** calculated  $m/z$  for  $C_{43}H_{51}N_{11}O_7S_2$   $[M]^+$  897.34, observed  $[M+H]^+$  898.68.

**Dethylation of the Met analogue** (5 mg) was desulfurized as described above for **5**. The product was purified directly from the reaction mixture via preparative HPLC and the eluted fractions freeze-dried to produce a fluffy white solid of the desulfurized peptide (1.2 mg, 25%).

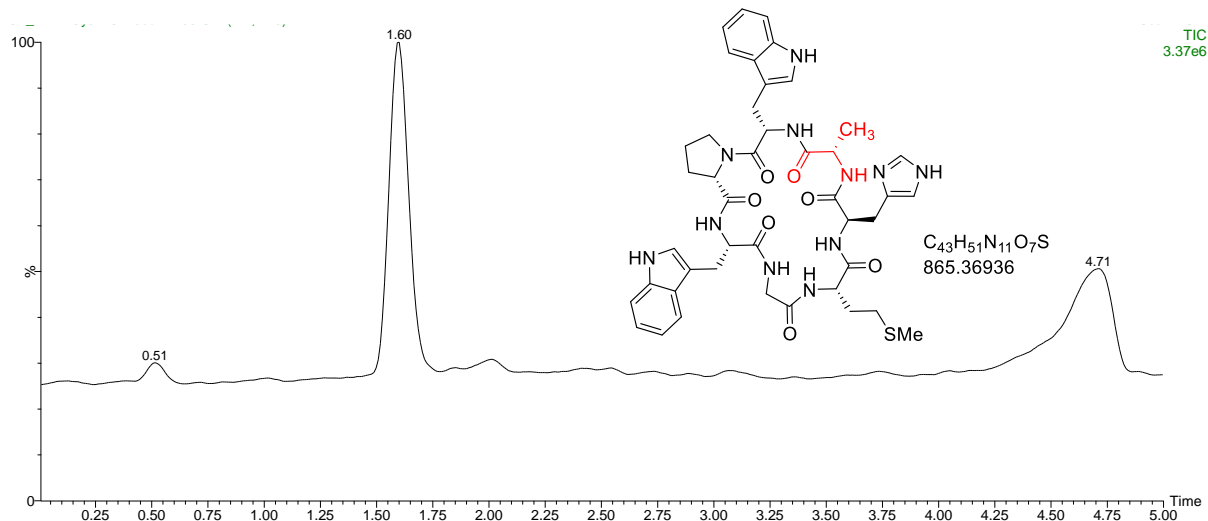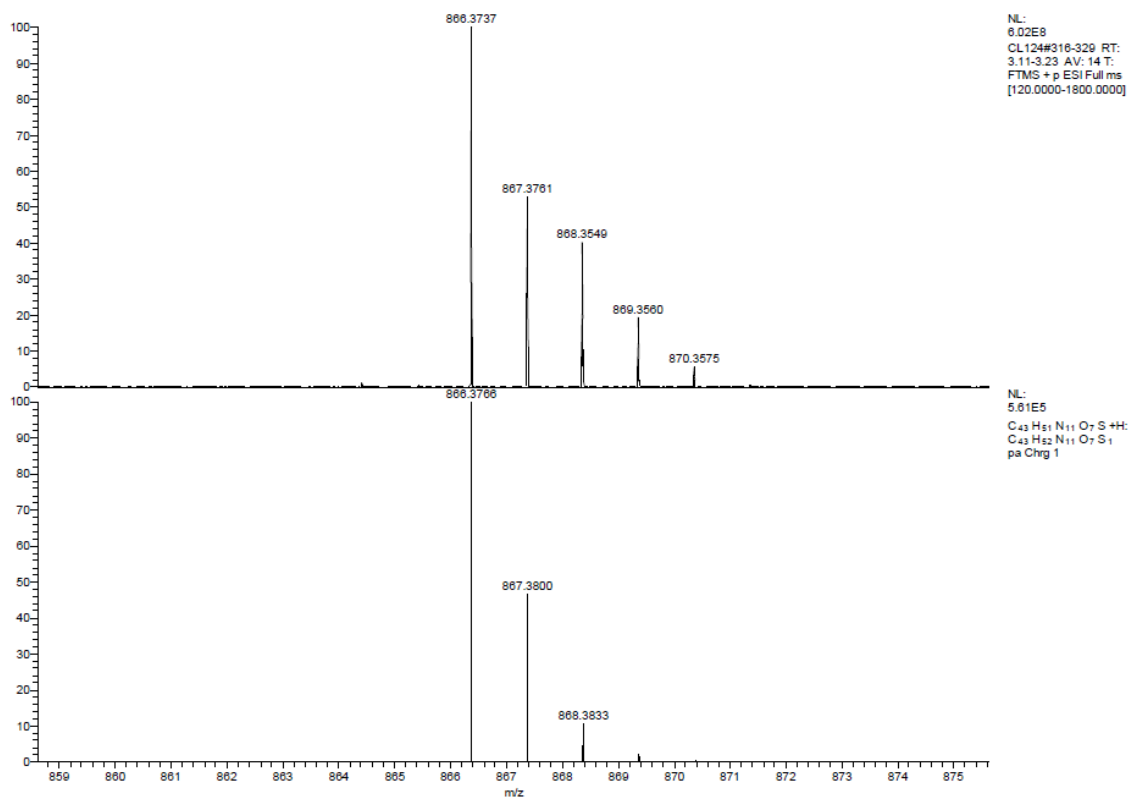

**Dethylation of linear peptide 3.** **3** (5 mg) was desulfurized as described above for **5**. After 8 h the product was purified directly from the reaction mixture via preparative HPLC and the eluted fractions freeze-dried to produce a fluffy white solid of the desulfurized peptide (0.6 mg, 0.65  $\mu$ mol, 13%).

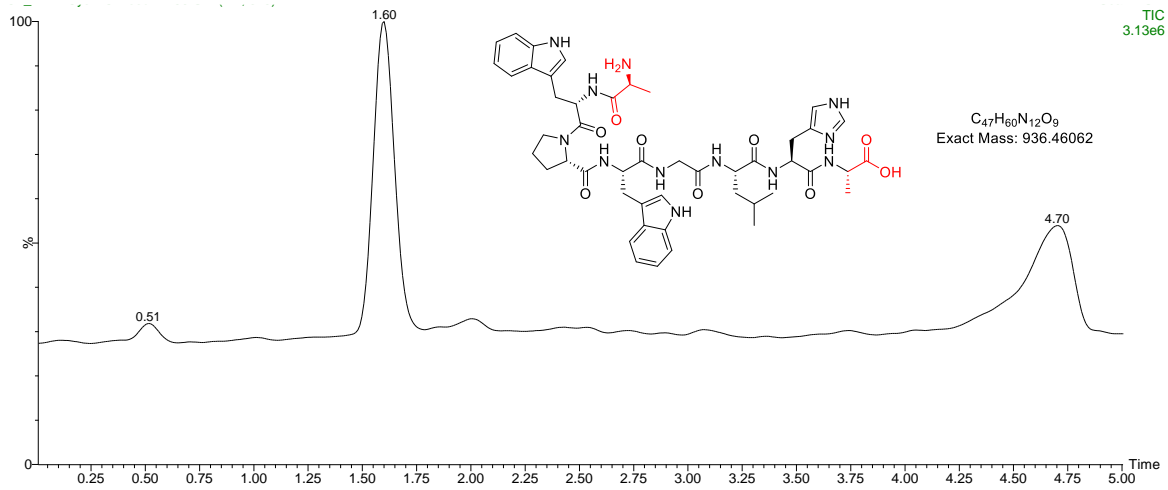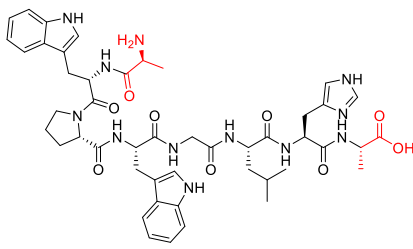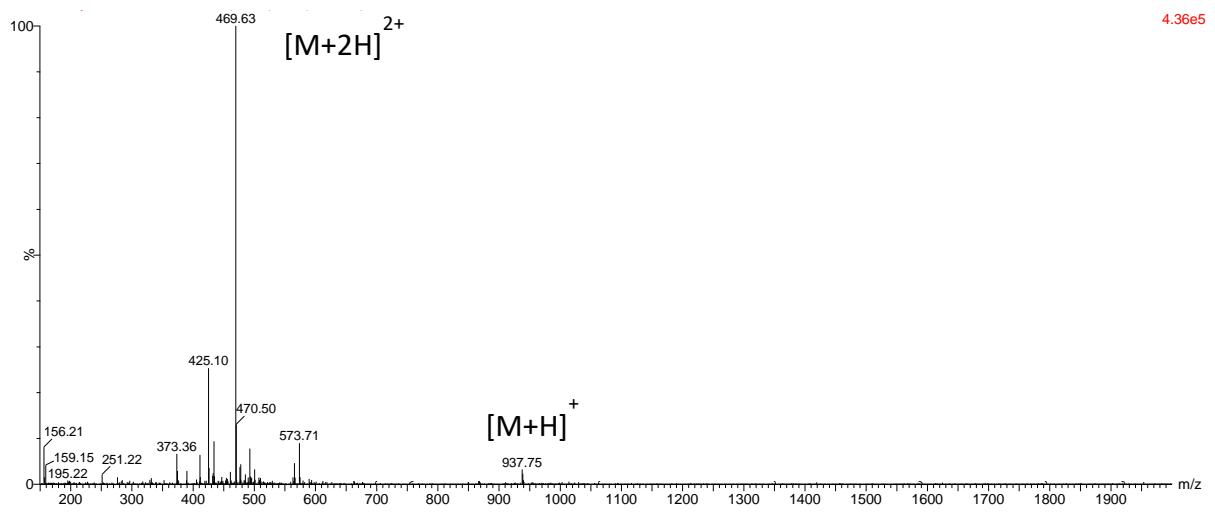

**Linear Peptide H-LYRAGC-OH (14)**

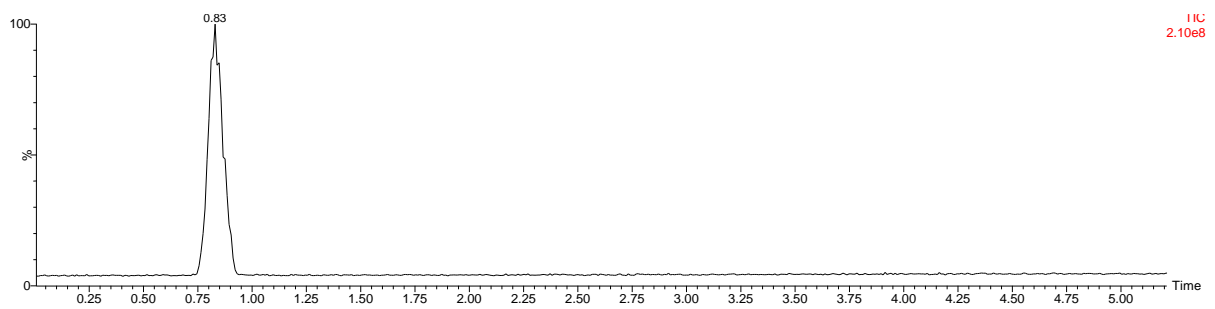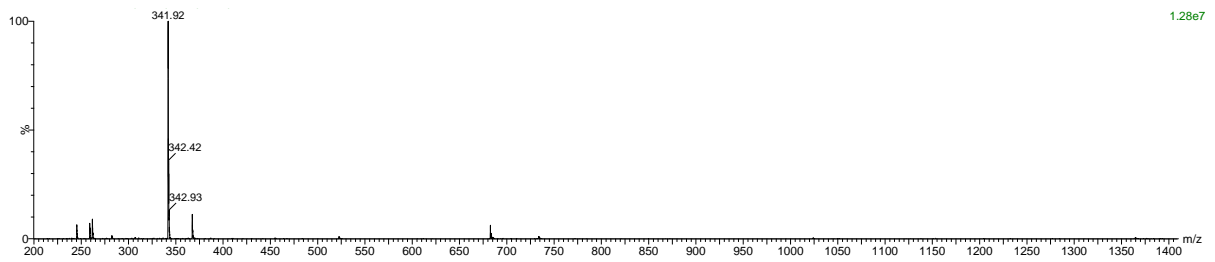

### Linear Peptide thioester (15)

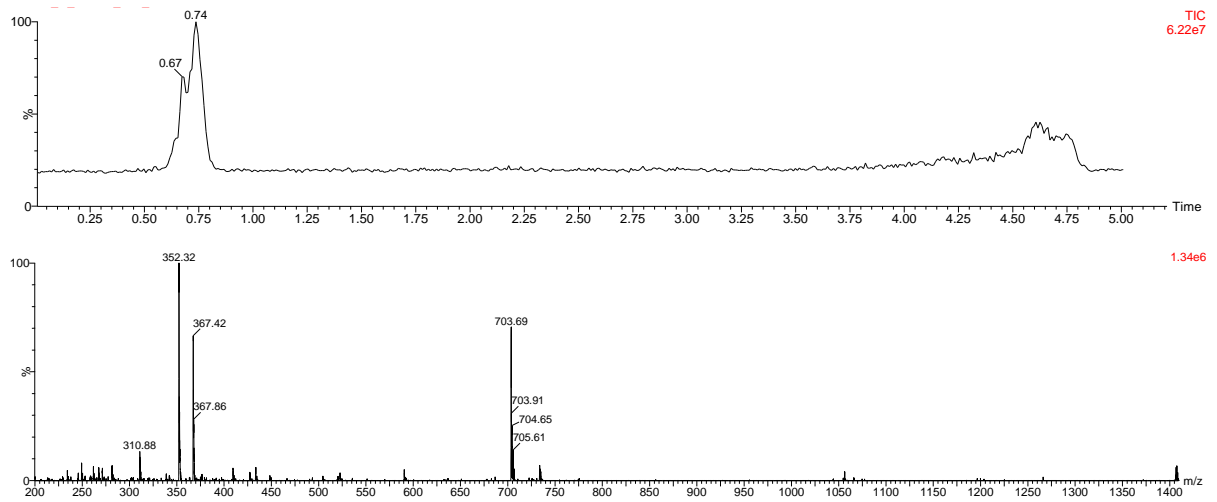

### Aldehyde 12

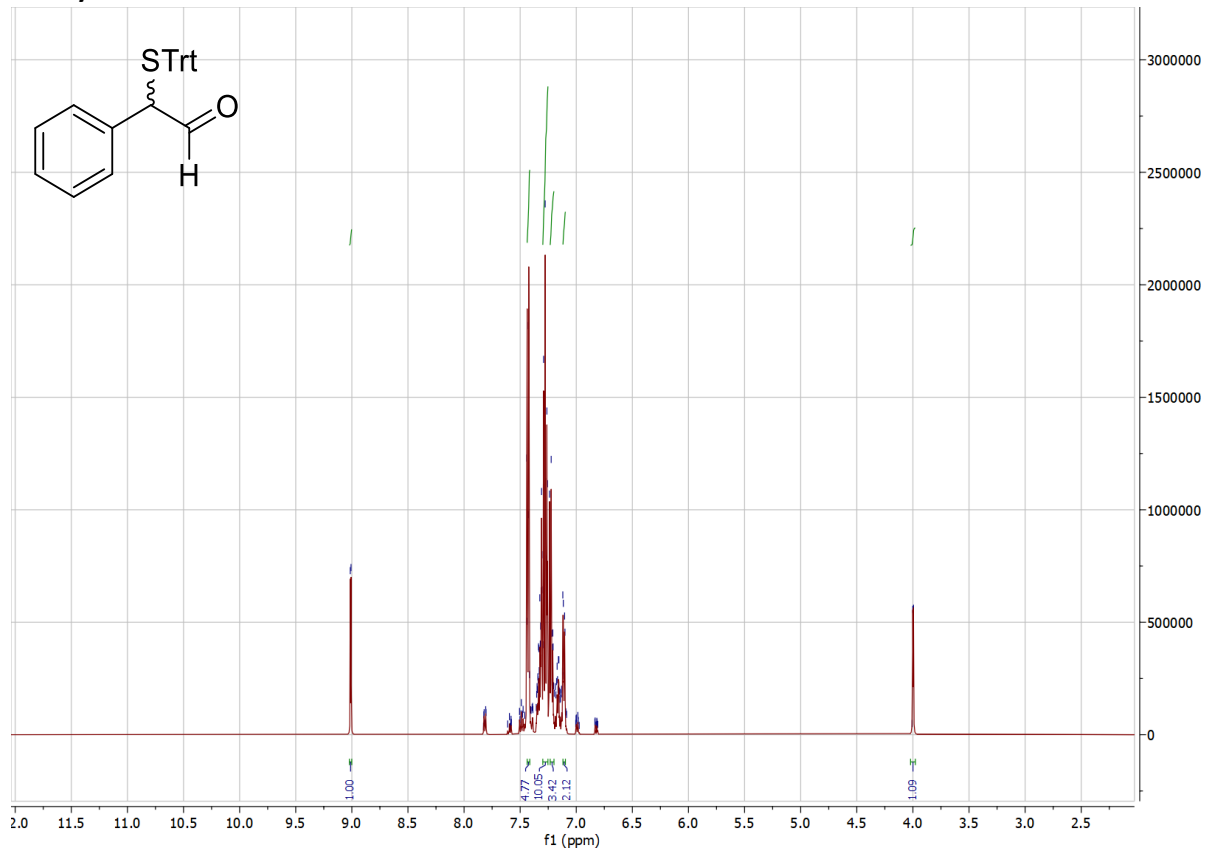

### Linear peptide Aux-GRAFS-NH<sub>2</sub> (13)

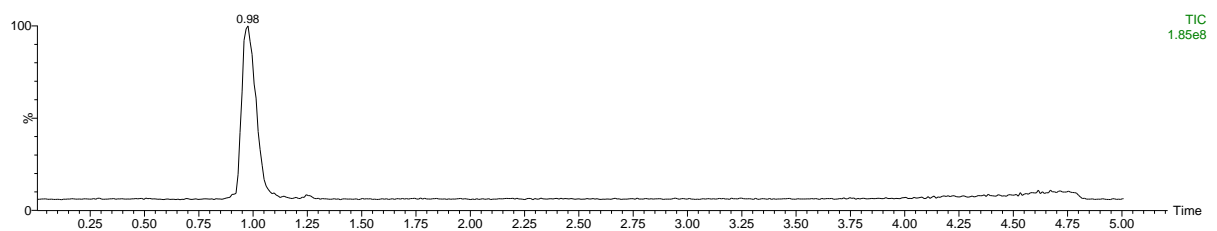



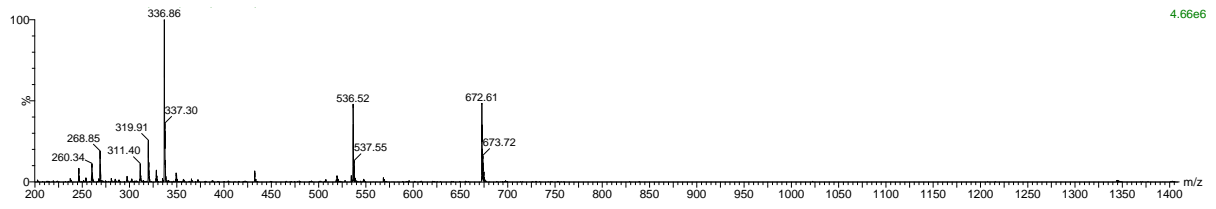

HRMS for peptide 17 calculated m/z for  $C_{49}H_{78}N_{17}O_{12}$   $[M+H]^+$  1096.6010, observed  $[M+H]^+$  1096.6019.

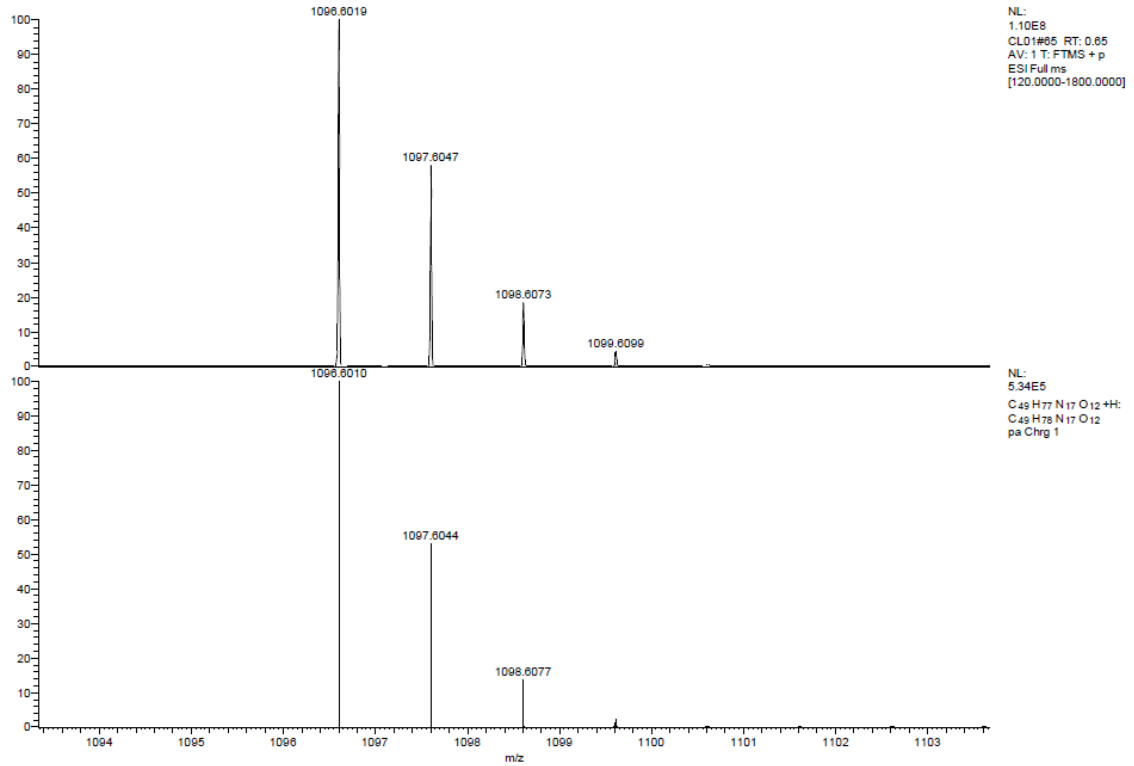

Supplement: d2ob01499h1.pdf [file d2ob01499h1.pdf]
